# Supplementary material
Source: publisher figshare collection journal article supplement (https://tandf.figshare.com/articles/dataset/_/9943859)
Supplement: Supplementary file 1 [file 1]

## Strategic elements in the Fort Cooper Coal Measures: potential rare earth elements and other multi-product targets

J. H. Hodgkinson<sup>a\*</sup> and M. Grigorescu<sup>b</sup>

<sup>a</sup>CSIRO Mineral Resources (Corresponding Author) 1, Technology Court, Pullenvale, Qld 4069, Australia. <sup>b</sup>GSQ DNRME, 1, William Street, Brisbane, Qld 4000, Australia.

Jane Hodgkinson ORCID <https://orcid.org/0000-0002-4031-3883>

Micaela Grigorescu ORCID <https://orcid.org/0000-0002-6236-5158>

\*Jane.Hodgkinson@csiro.au

### SUPPLEMENTARY PAPERS

*Australian Journal of Earth Sciences* (2020) 67, doi:10.1080/08120099.2019.1660712

---

Copies of Supplementary Papers may be obtained from the Geological Society of Australia's website ([www.gsa.org.au](http://www.gsa.org.au)), the Australian Journal of Earth Sciences website ([www.ajes.com.au](http://www.ajes.com.au)) or from the National Library of Australia's Pandora archive (<https://pandora.nla.gov.au/tep/150555>).

---

### Supplementary paper

Appendix 1. Complete dataset of chemical analyses (excel file).
